# Supplementary material for: Factors Associated with Early Mortality in Acute Type A Aortic Dissection—A Single-Centre Experience
Source: MDPI journal article supplement (doi:10.3390/jcm13041023), 2024-02-10
Supplement: s1 [file s1]

**Supplementary Table S1:** CT angiography findings on admission.

|                              | Survivors n=97<br>(%) | Non-survivors<br>n=20 (%) | Analysed<br>cases (n) | Association with<br>mortality (p-value) |
|------------------------------|-----------------------|---------------------------|-----------------------|-----------------------------------------|
| <b>Entry localization</b>    |                       |                           | 91                    | 0.06                                    |
| 0                            | 73 (99)               | 15 (88)                   |                       |                                         |
| 1                            | 0 (0)                 | 1 (6)                     |                       |                                         |
| >2                           | 1 (1)                 | 1 (6)                     |                       |                                         |
| <b>Distal end</b>            |                       |                           | 91                    | 0.06                                    |
| 0                            | 4 (5)                 | 1 (6)                     |                       |                                         |
| 1                            | 0 (0)                 | 0 (0)                     |                       |                                         |
| 2                            | 0 (0)                 | 0 (0)                     |                       |                                         |
| 3                            | 2 (3)                 | 0 (0)                     |                       |                                         |
| 4                            | 1 (1)                 | 0 (0)                     |                       |                                         |
| 5                            | 2 (3)                 | 0 (0)                     |                       |                                         |
| 6                            | 0 (0)                 | 0 (0)                     |                       |                                         |
| 7                            | 2 (3)                 | 1 (6)                     |                       |                                         |
| 8                            | 0 (0)                 | 0 (0)                     |                       |                                         |
| 9                            | 2 (3)                 | 4 (24)                    |                       |                                         |
| 10-11                        | 65 (83)               | 11 (65)                   |                       |                                         |
| Intramural<br>haematoma      | 2 (14)                | 2 (11)                    | 111                   | 0.27                                    |
| Max aortic diameter          | 5.6±1.1               | 5±1                       | 35                    | 0.24                                    |
| Cerebral<br>malperfusion     | 11 (14)               | 5 (33)                    | 92                    | 0.16                                    |
| Renovisceral<br>malperfusion | 23 (26)               | 5 (25)                    | 117                   | 1                                       |
| Extremity<br>malperfusion    | 16 (26)               | 5 (38)                    | 74                    | 0.58                                    |

**Supplementary Table S2:** Univariate logistic regression model.

|                                            | <b>OR</b> | <b>95% CI</b> | <b>p-value</b> |
|--------------------------------------------|-----------|---------------|----------------|
| <b>Neurological deficits</b>               | 7.45      | 1.69; 52.01   | 0.016*         |
| <b>Spinal ischaemia</b>                    | 1.04      | 0.22; 3.7     | 0.952          |
| <b>Cerebral ischaemia</b>                  | 3         | 0.81; 10.3    | 0.085          |
| <b>Cerebral perfusion</b>                  | 1.26      | 0.4; 3.68     | 0.681          |
| <b>Oral anticoagulation</b>                | 3.79      | 0.89; 14.84   | 0.057          |
| <b>Hypertension</b>                        | 6.16      | 1.65; 40.13   | 0.019*         |
| <b>Acute limb ischaemia, postoperative</b> | 5.53      | 0.96; 32.14   | 0.046*         |
| <b>Sepsis</b>                              | 2.14      | 0.76; 5.85    | 0.138          |
| <b>ARDS</b>                                | 4.68      | 1.09; 18.28   | 0.028*         |
| <b>Acute kidney injury, postoperative</b>  | 8.52      | 2.85; 31.67   | <0.001*        |
| <b>Reperfusion time (30min)</b>            | 1.33      | 0.84; 2.11    | 0.227          |
| <b>Aortic cross clamp time (30min)</b>     | 1.19      | 0.88; 1.61    | 0.251          |
| <b>Circulatory arrest time (30min)</b>     | 1.68      | 0.86; 3.28    | 0.125          |
| <b>Total bypass time (30min)</b>           | 1.18      | 0.98; 1.41    | 0.074          |

OR: odds ratio; ARDS: acute respiratory distress syndrome; CI: confidence interval.

**Supplementary Table S3:** Summary of logistic regression coefficients after best subset selection.

|                              | <b>Estimate</b> | <b>Std. Error</b> | <b>Z value</b> | <b>p-value</b> | <b>OR</b> | <b>95% CI</b> |
|------------------------------|-----------------|-------------------|----------------|----------------|-----------|---------------|
| <b>(Intercept)</b>           | -3.614          | 0.734             | -4.922         | <0.001         |           |               |
| <b>Neurological deficits</b> | 1.757           | 0.854             | 2.057          | 0.04*          | 5.79      | 1.22;41.6     |
| <b>ARDS</b>                  | 1.175           | 0.95              | 1.238          | 0.216          | 3.24      | 3.96;19.20    |

ARDS: acute respiratory distress syndrome; CI: confidence interval.
